# Supplementary material for: Reported community-level indoor residual spray coverage from two-stage cluster surveys in sub-Saharan Africa
Source: PubMed Central journal article supplement (PMC5470197; doi:10.1186/s12936-017-1893-x), 2017-06-13

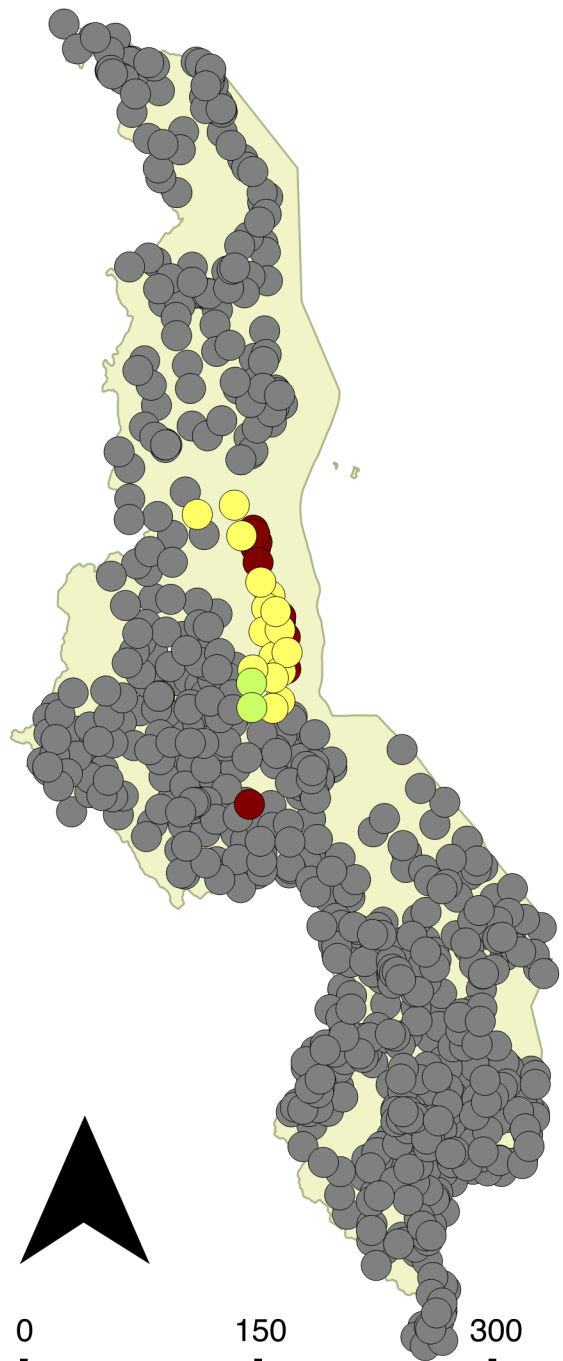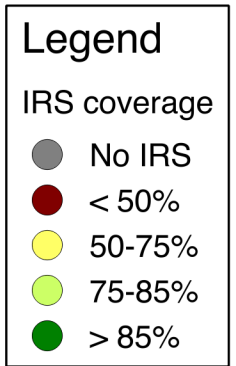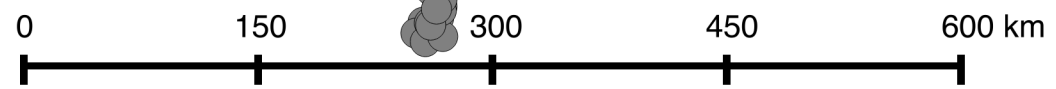

Supplement: 12936_2017_1893_MOESM16_ESM.pdf [file 12936_2017_1893_MOESM16_ESM.pdf]
