# Supplementary material for: Reported community-level indoor residual spray coverage from two-stage cluster surveys in sub-Saharan Africa
Source: Springer Nature journal article supplement (doi:10.1186/s12936-017-1893-x), 2017-06-13
Supplement: MOESM13 [file 12441914]

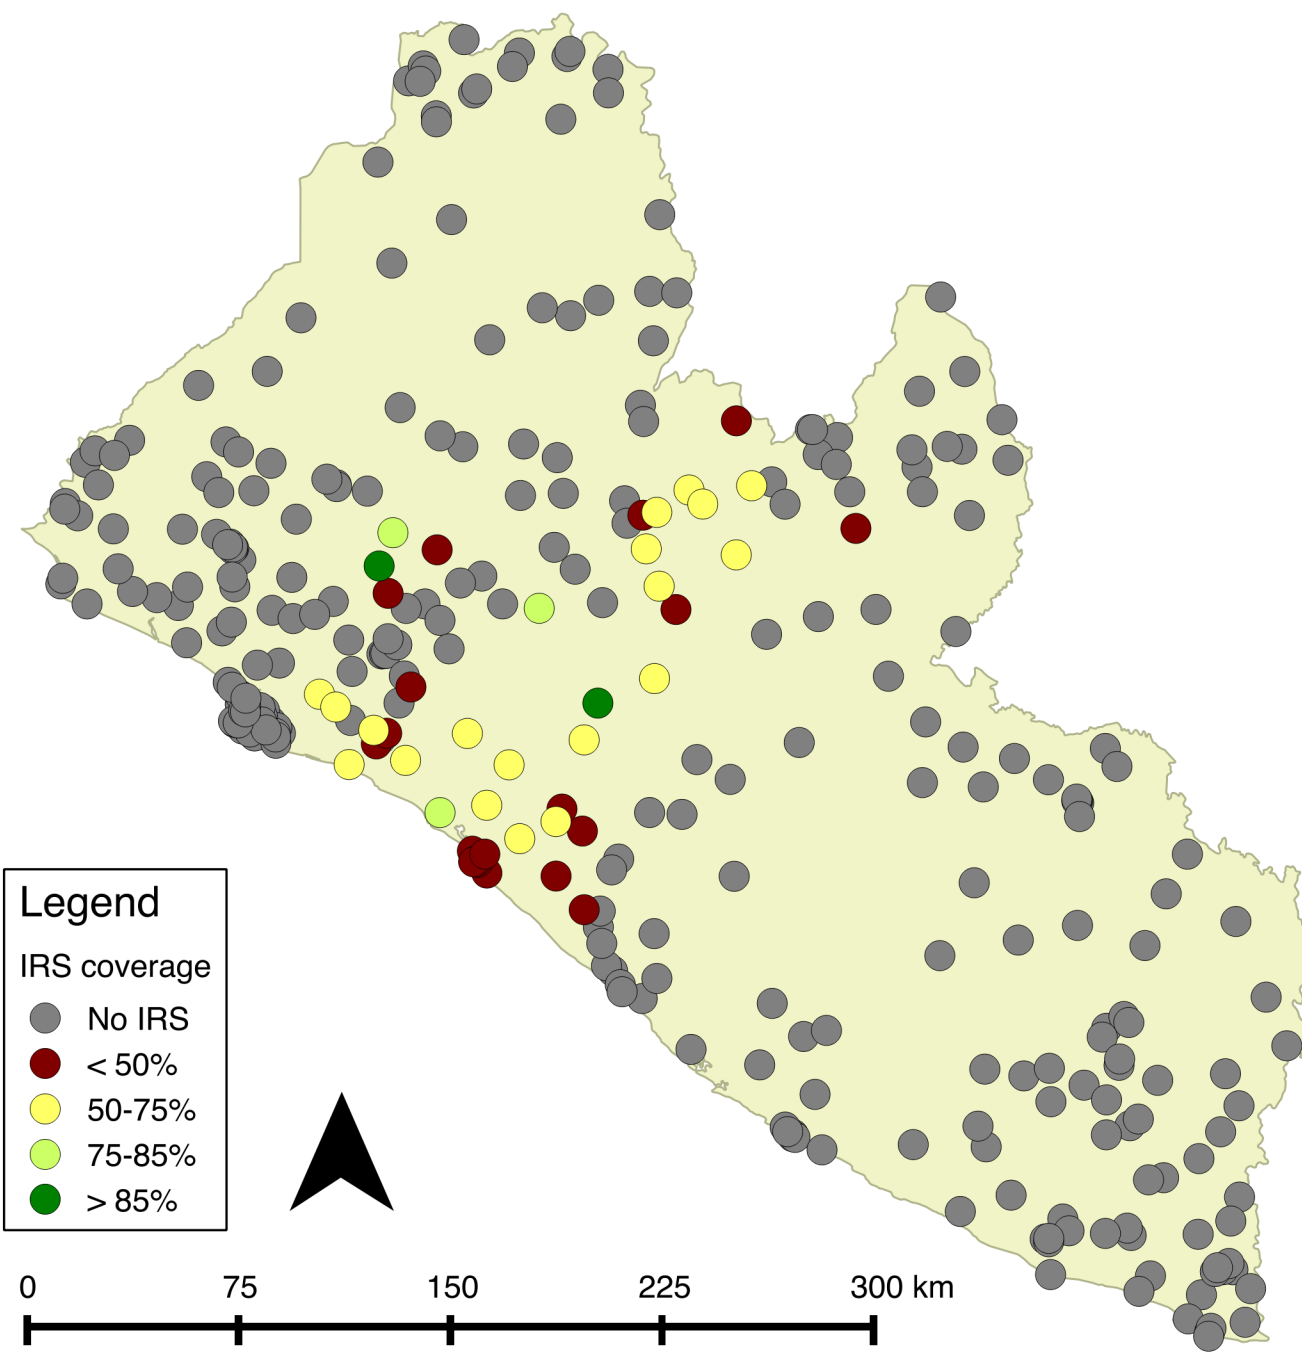

**Legend**  
IRS coverage

- No IRS
- < 50%
- 50-75%
- 75-85%
- > 85%

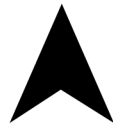

0 75 150 225 300 km
