# Supplementary material for: Reported community-level indoor residual spray coverage from two-stage cluster surveys in sub-Saharan Africa
Source: Springer Nature journal article supplement (doi:10.1186/s12936-017-1893-x), 2017-06-13

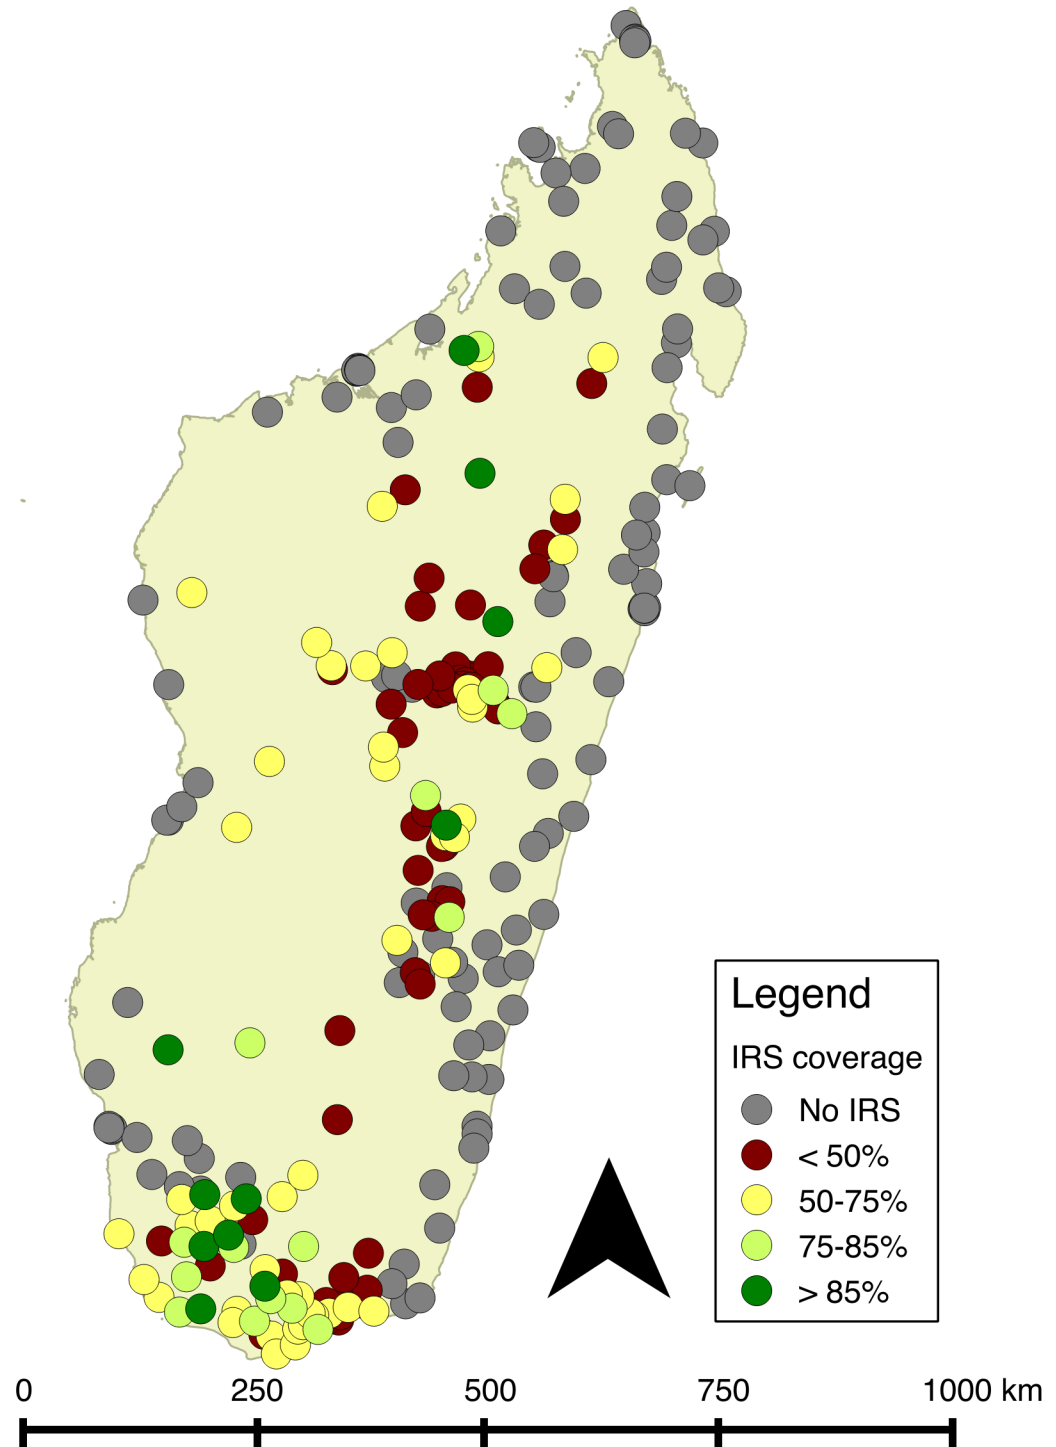

Supplement: MOESM15 [file 12441914]
